# Supplementary material for: Degradation mechanisms in mixed-cation and mixed-halide CsxFA1−xPb(BryI1−y)3 perovskite films under ambient conditions
Source: Royal Society of Chemistry journal article supplement (doi:10.1039/d0ta01201g), 2020-01-01
Supplement: d0ta01201g1.pdf [file d0ta01201g1.pdf]

## Supporting Information

### Degradation mechanisms in mixed-cation and mixed-halide $\text{Cs}_x\text{FA}_{1-x}\text{Pb}(\text{Br}_y\text{I}_{1-y})_3$ perovskite films under ambient conditions

*Paulo Ernesto Marchezi<sup>a</sup>, Eralci Moreira Therézio<sup>a,b</sup>, Rodrigo Szostak<sup>a</sup>, Hugo Campos Loureiro<sup>a</sup>, Karsten Bruening<sup>c</sup>, Aryeh Gold-Parker<sup>c</sup>, Maurício A. Melo Jr.<sup>d</sup>, Christopher J. Tassone<sup>c</sup>, Helio C. N. Tolentino<sup>e</sup>, Michael F. Toney<sup>c</sup> and Ana Flávia Nogueira<sup>\*a</sup>*

<sup>a</sup>*Chemistry Institute, University of Campinas, Campinas, SP, Brazil.*

<sup>b</sup>*Physics Institute, Federal University of Mato Grosso, Cuiabá, MT, Brazil.*

<sup>c</sup>*Stanford Synchrotron Radiation LightSource (SSRL), Menlo Park, California, USA.*

<sup>d</sup>*São Carlos Institute of Physics, University of São Paulo, 13560-970, São Carlos, SP, Brazil.*

<sup>e</sup>*Brazilian Synchrotron Light Laboratory (LNLS), Brazilian Center for Research in Energy and Materials (CNPEM), Campinas, SP 13083-970, Brazil.*

*\*Corresponding author: anafla@unicamp.br*

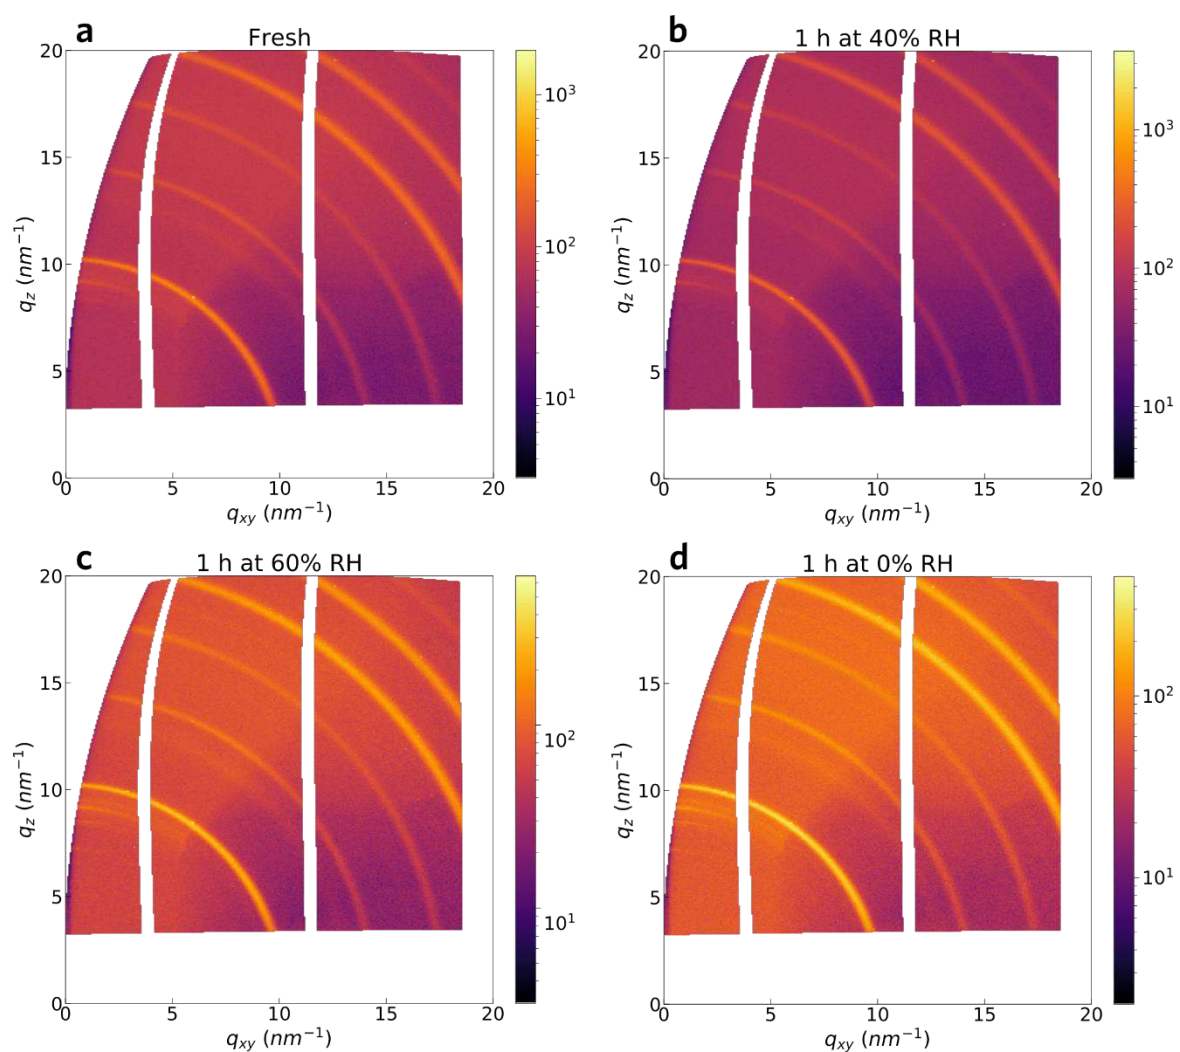

Figure S 1: GIWAXS reciprocal lattice maps related to the 1D profiles in Figure 1a and 1b (sample 10/17). Fresh (a), after 1 h at 40% RH (b), after 1 h at 60% RH (c) and after 1 h back to 0% RH (d).

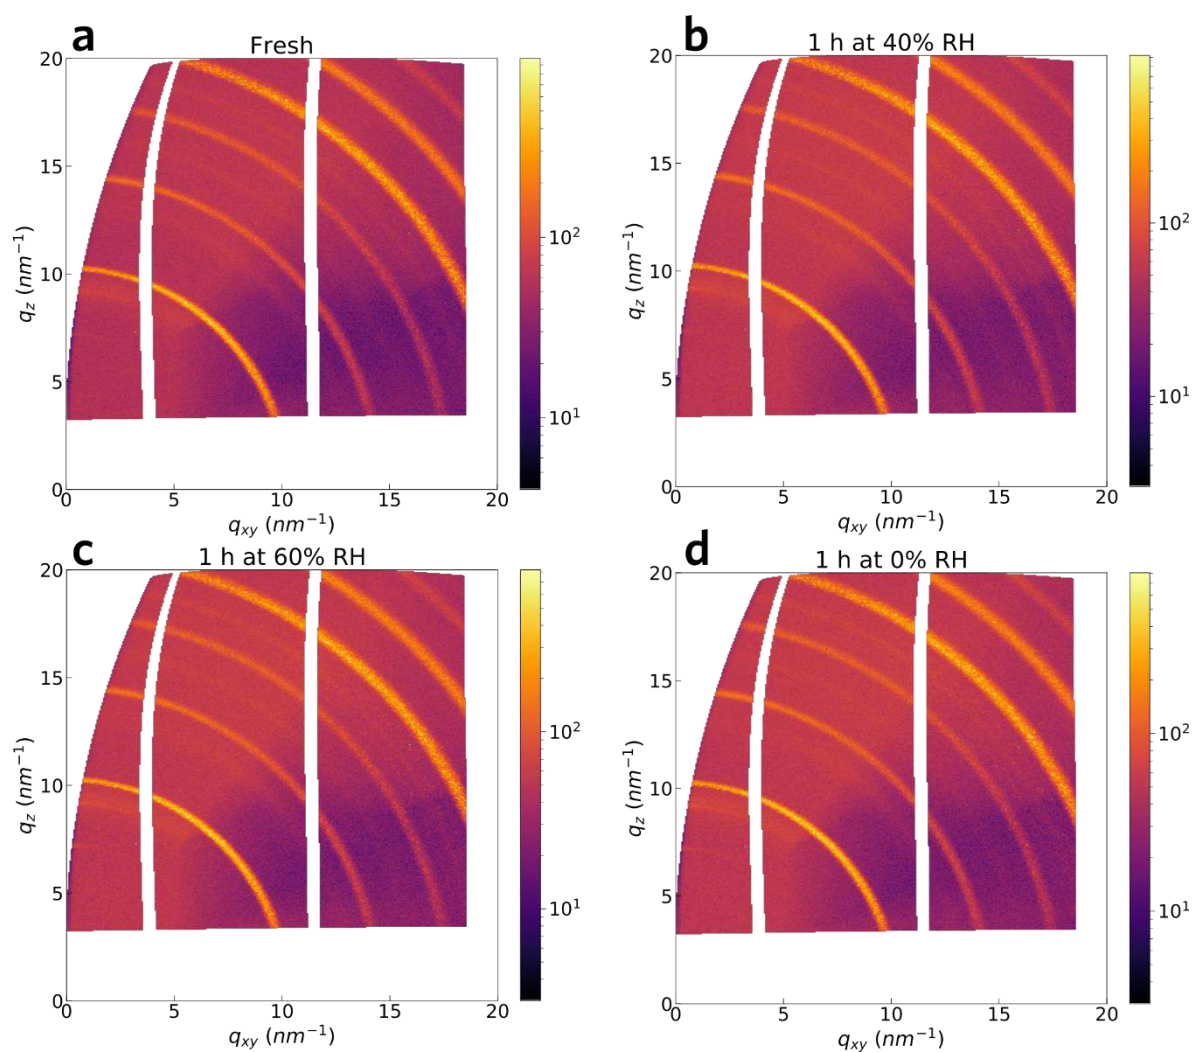

Figure S 2: GIWAXS reciprocal lattice maps related to the 1D profiles in Figure 1a and 1c (sample 20/17). Fresh (a), after 1 h at 40% RH (b), after 1 h at 60% RH (c) and after 1 h back to 0% RH (d).

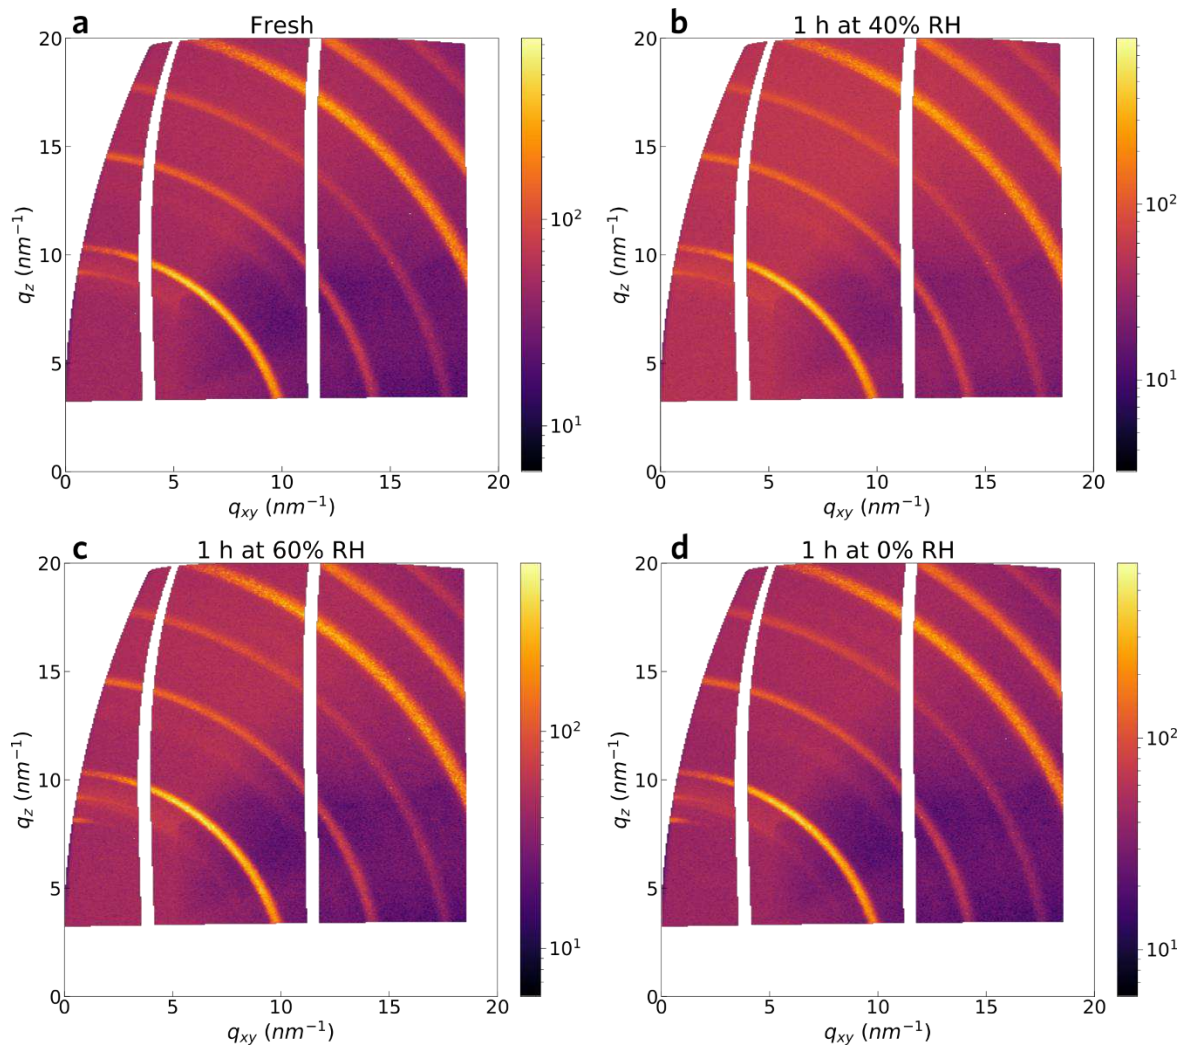

Figure S 3: GIWAXS reciprocal lattice maps related to the 1D profiles in Figure 1a and 1d (sample 10/38). Fresh (a), after 1 h at 40% RH (b), after 1 h at 60% RH (c) and after 1 h back to 0% RH (d).

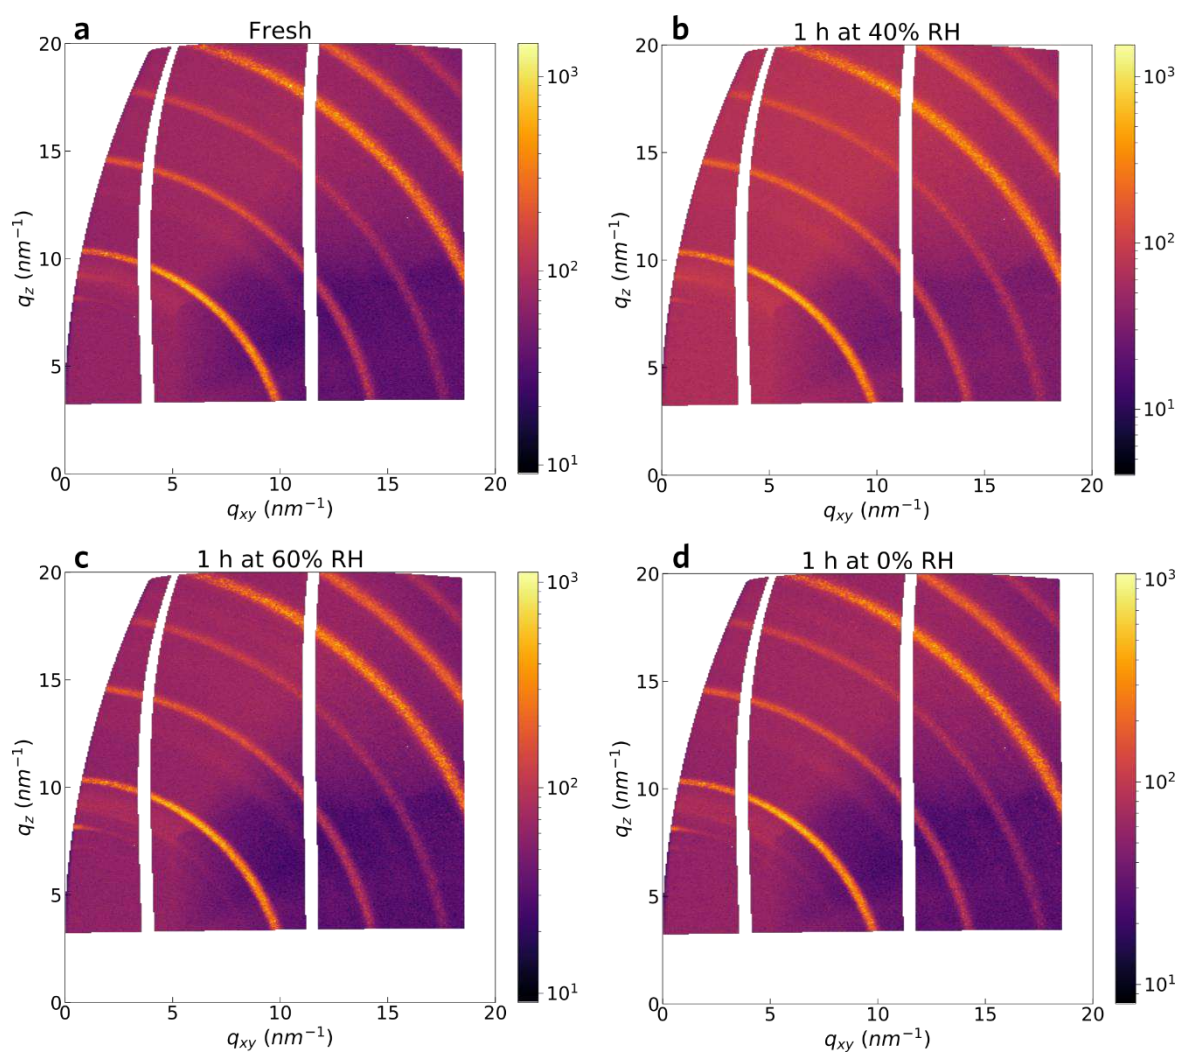

Figure S 4: GIWAXS reciprocal lattice maps related to the 1D profiles in Figure 1a and 1f (sample 20/38). Fresh (a), after 1 h at 40% RH (b), after 1 h at 60% RH (c) and after 1 h back to 0% RH (d).

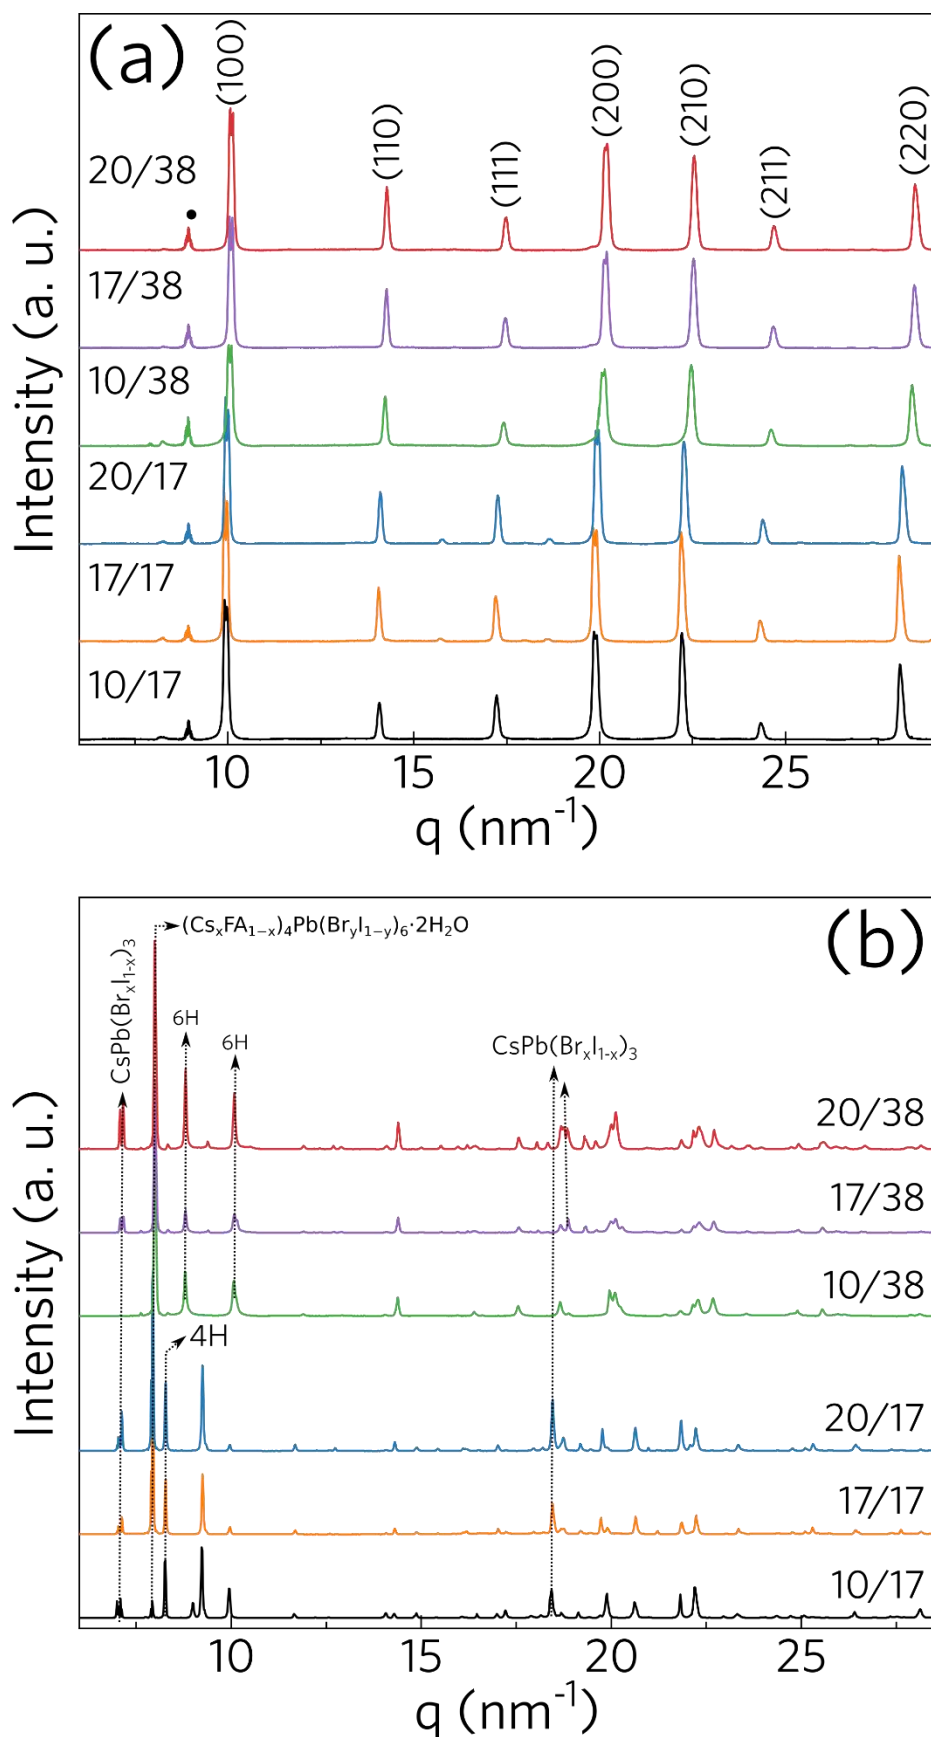

Figure S 5: (a) XRD patterns taken before and (b) all range of the XRD presented in Figure 2 (after degradation). The reciprocal lattice maps for all the 1D profiles in (a) and (b) are presented in Figure S6 and Figure S7, respectively.



Table S 1: Attribution of diffractograms peaks of Figure S7.

| <i>Cs<sub>y</sub>FA<sub>(1-y)</sub>Pb(Br<sub>x</sub>I<sub>(1-x)</sub>)<sub>3</sub> after degradation</i> |                                                                                                                                                                                                                                             |
|----------------------------------------------------------------------------------------------------------|---------------------------------------------------------------------------------------------------------------------------------------------------------------------------------------------------------------------------------------------|
| Peak ( <i>q</i> / <i>nm<sup>-1</sup></i> )                                                               | Attribution                                                                                                                                                                                                                                 |
| <b>6.9, 7.1</b>                                                                                          | δ-CsPbX <sub>3</sub> (orthorhombic) [1]                                                                                                                                                                                                     |
| <b>8</b>                                                                                                 | (Cs <sub>x</sub> FA <sub>1-x</sub> ) <sub>4</sub> Pb(Br <sub>y</sub> I <sub>1-y</sub> ) <sub>6</sub> ·2H <sub>2</sub> O [1], [2]                                                                                                            |
| <b>8.2, 9.2</b>                                                                                          | 4H phase [1]                                                                                                                                                                                                                                |
| <b>8.7, 9.9</b>                                                                                          | 6H phase [1]                                                                                                                                                                                                                                |
| <b>9.9-10.1</b>                                                                                          | 6H and 3R/3C phases [1]                                                                                                                                                                                                                     |
| <b>11.6</b>                                                                                              | PbO                                                                                                                                                                                                                                         |
| <b>12.3</b>                                                                                              | PbBr <sub>2</sub> (110) [3], [4]                                                                                                                                                                                                            |
| <b>12.1, 12.4, 18.5</b>                                                                                  | δ Yellow Delta Phase (orthorhombic) [2] (CsPbX <sub>3</sub> )                                                                                                                                                                               |
| <b>18.9</b>                                                                                              | CsI [5]                                                                                                                                                                                                                                     |
| <b>21.7-22.7</b>                                                                                         | Cs <sub>x</sub> FA <sub>1-x</sub> Pb(Br <sub>y</sub> I <sub>1-y</sub> ) <sub>3</sub> ·H <sub>2</sub> O and (Cs <sub>x</sub> FA <sub>1-x</sub> ) <sub>4</sub> Pb(Br <sub>y</sub> I <sub>1-y</sub> ) <sub>6</sub> ·2H <sub>2</sub> O [1], [2] |
| <b>24.4</b>                                                                                              | CsPbX <sub>3</sub> [5]                                                                                                                                                                                                                      |
| <b>26.1</b>                                                                                              | PbBr <sub>2</sub> [2]                                                                                                                                                                                                                       |

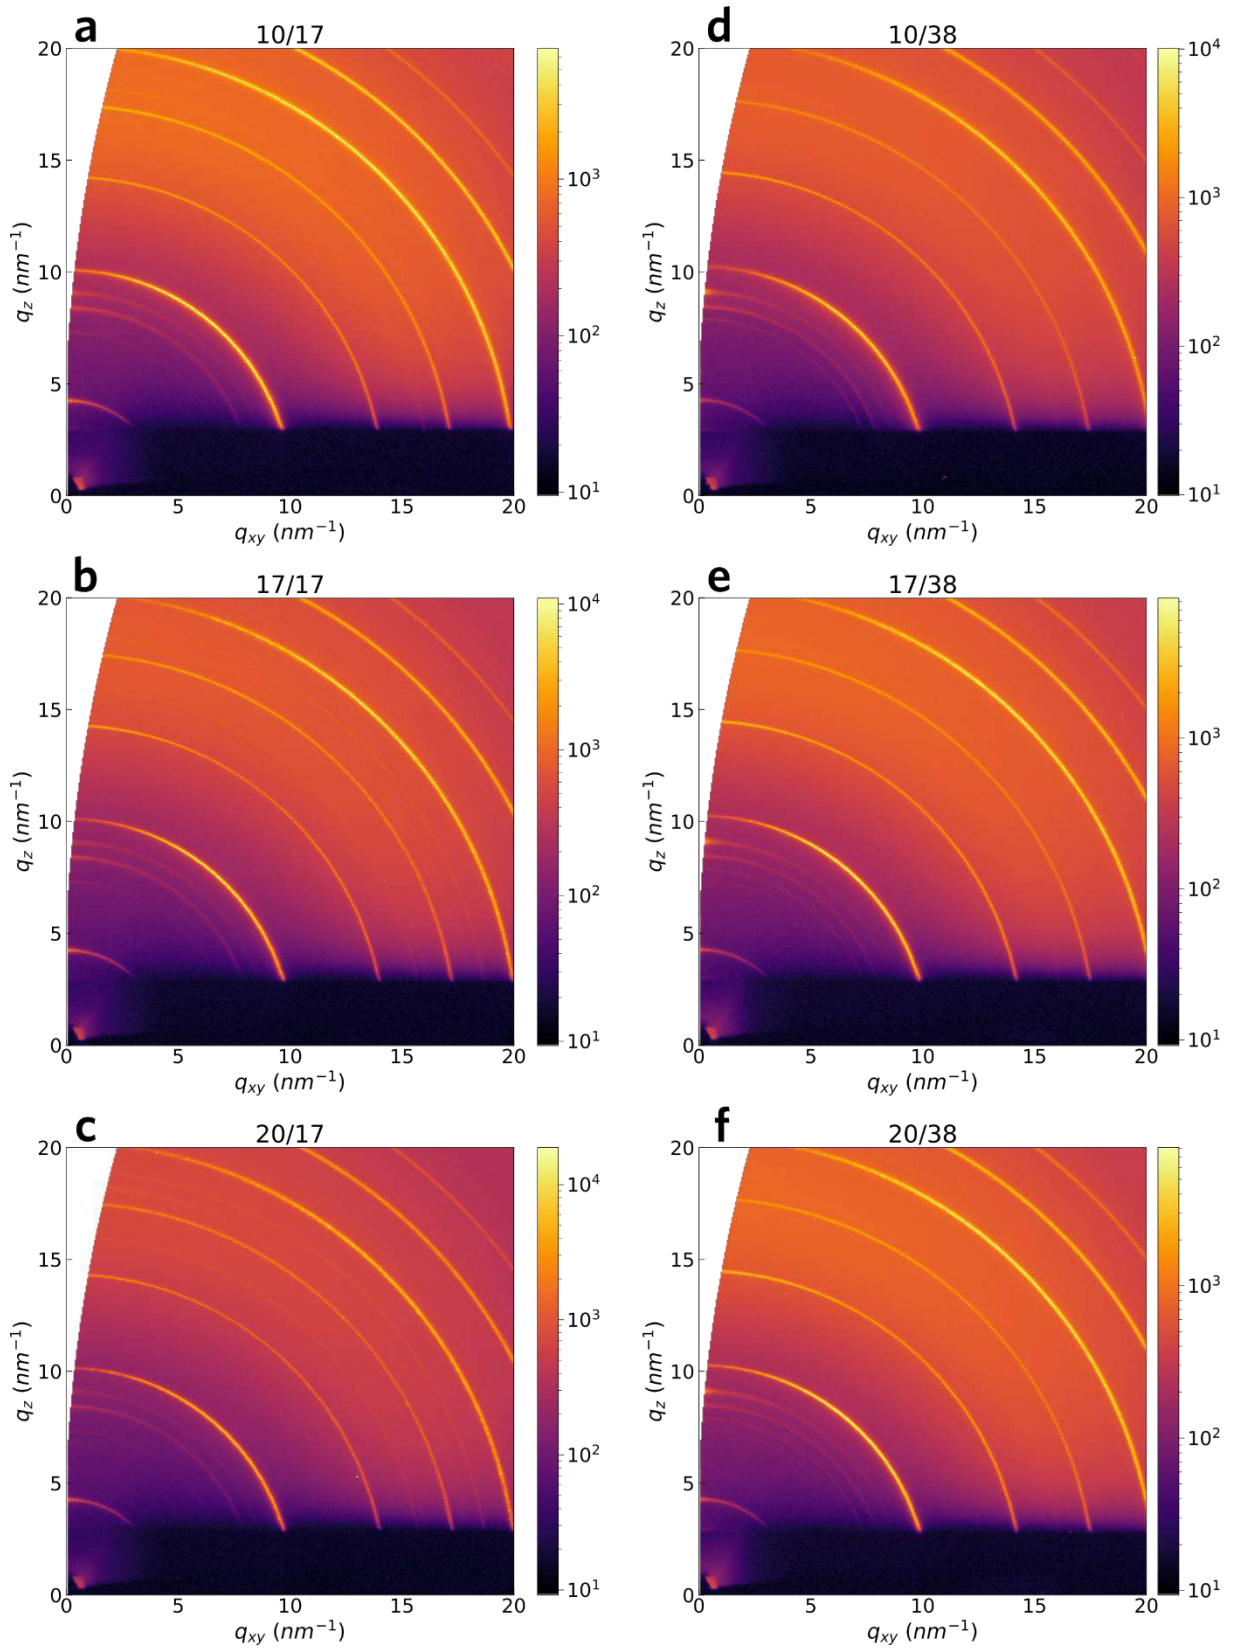

Figure S 6: GIWAXS reciprocal lattice maps of all the XRD presented in Figure S5(a). Pristine 10/17 (a), pristine 17/17 (b), pristine 20/17 (c), pristine 10/38(d), pristine 17/38 (e) and pristine 20/38 (f).



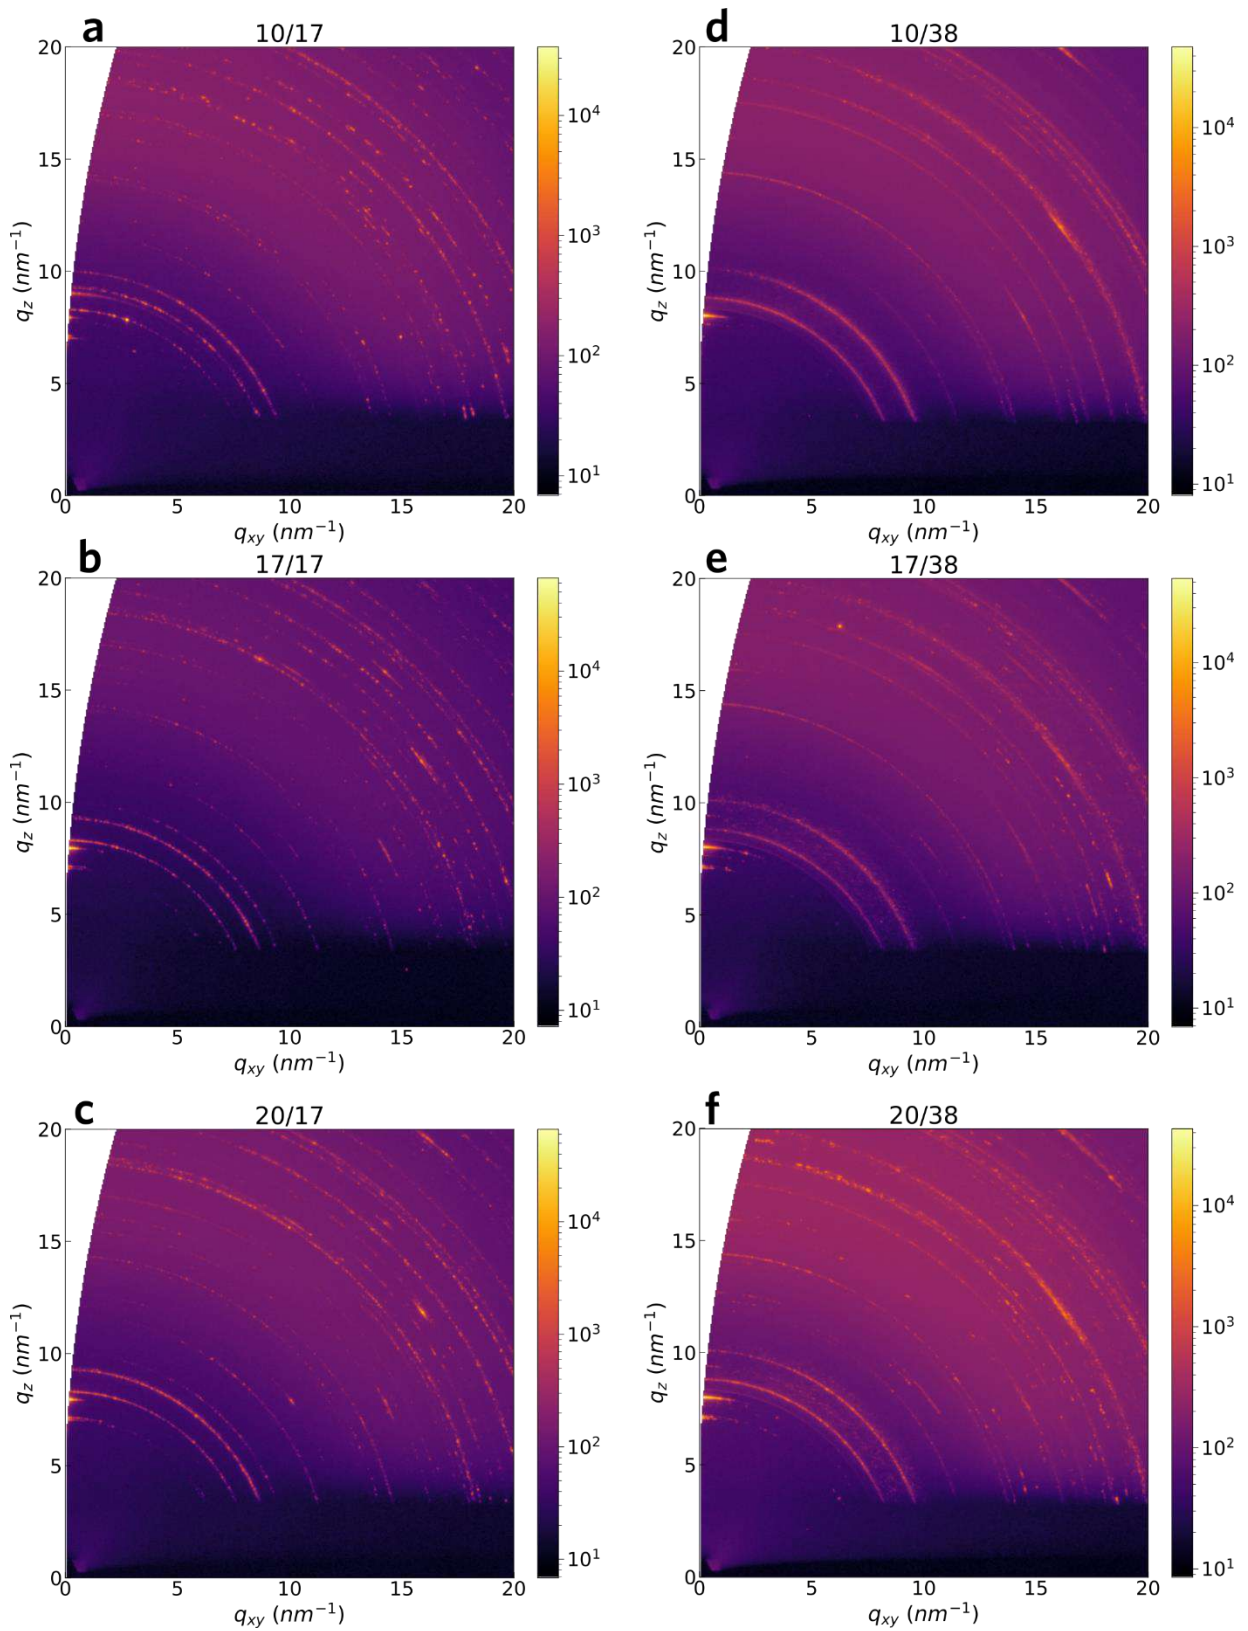

Figure S 7: GIWAXS reciprocal lattice maps of all the XRD presented in Figure S5(b) and Figure 2. Degraded10/17 (a), degraded 17/17 (b), degraded 20/17 (c), degraded 10/38(d), degraded 17/38 (e) and degraded 20/38 (f).

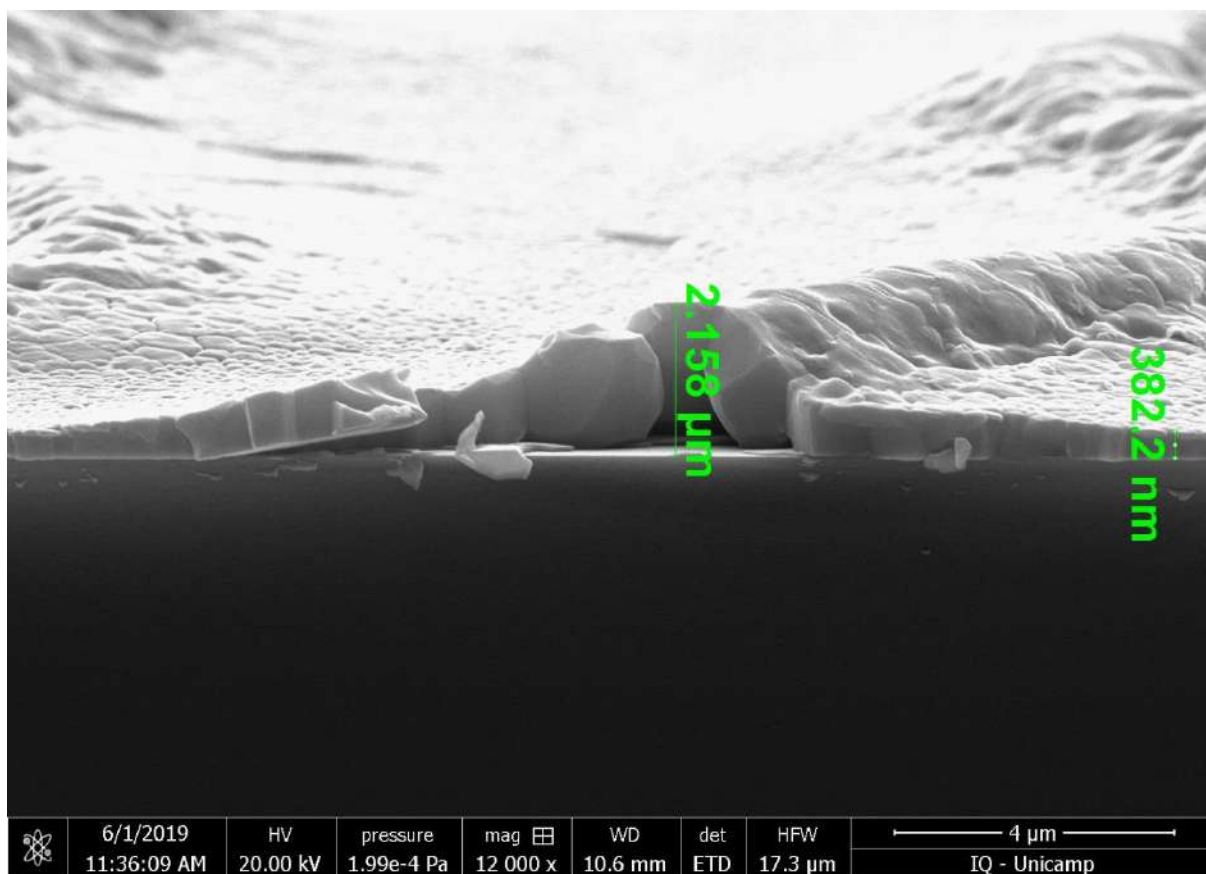

Figure S 8: Cross section SEM image of sample 17/17.

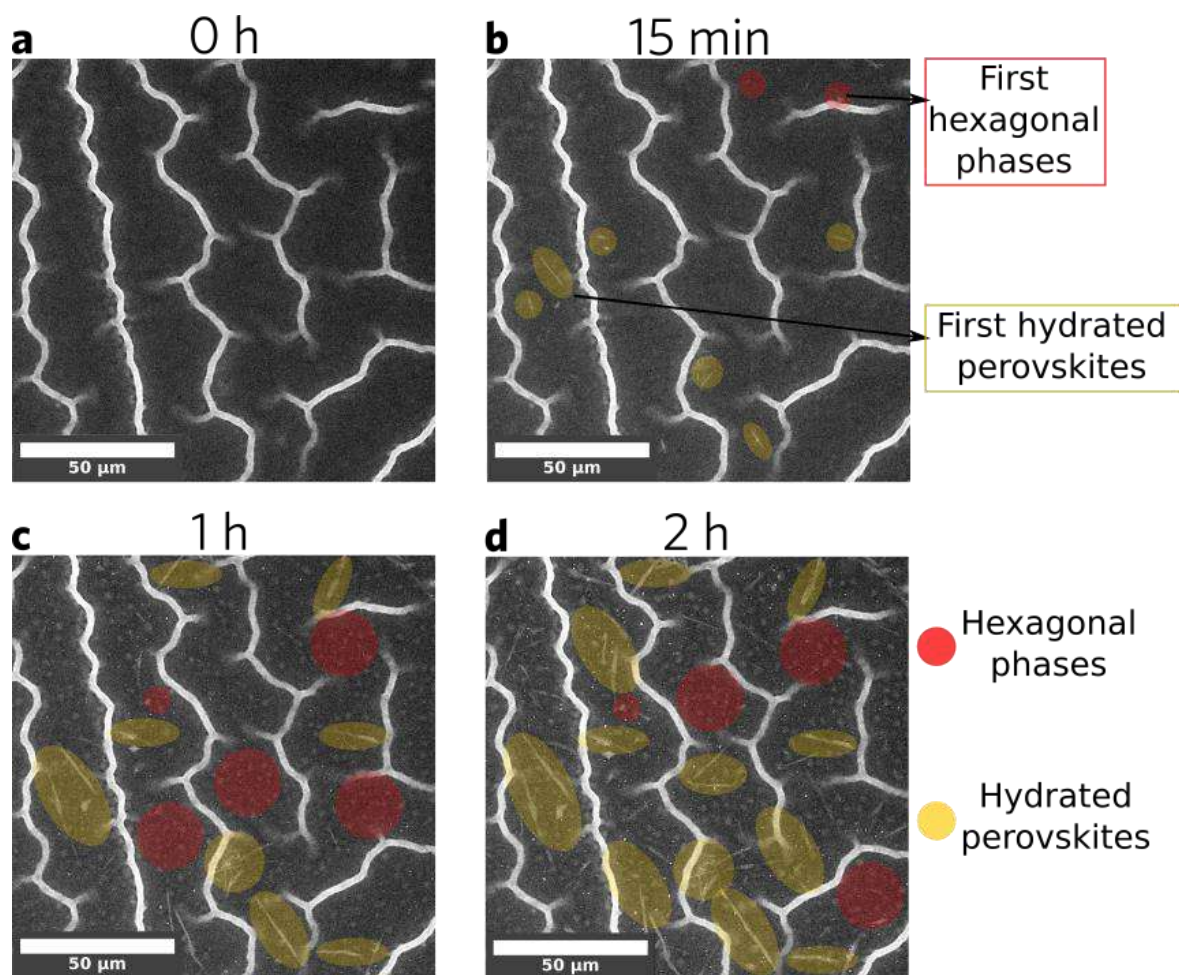

Figure S 9: In-situ FEG-ESEM images during degradation of sample 10/38 upon humidity exposition (75 %rH). (a) fresh sample, (b) 15 min, (c) 1 h, (d) 2 h. See the Supporting Videos for a real-time visualization.



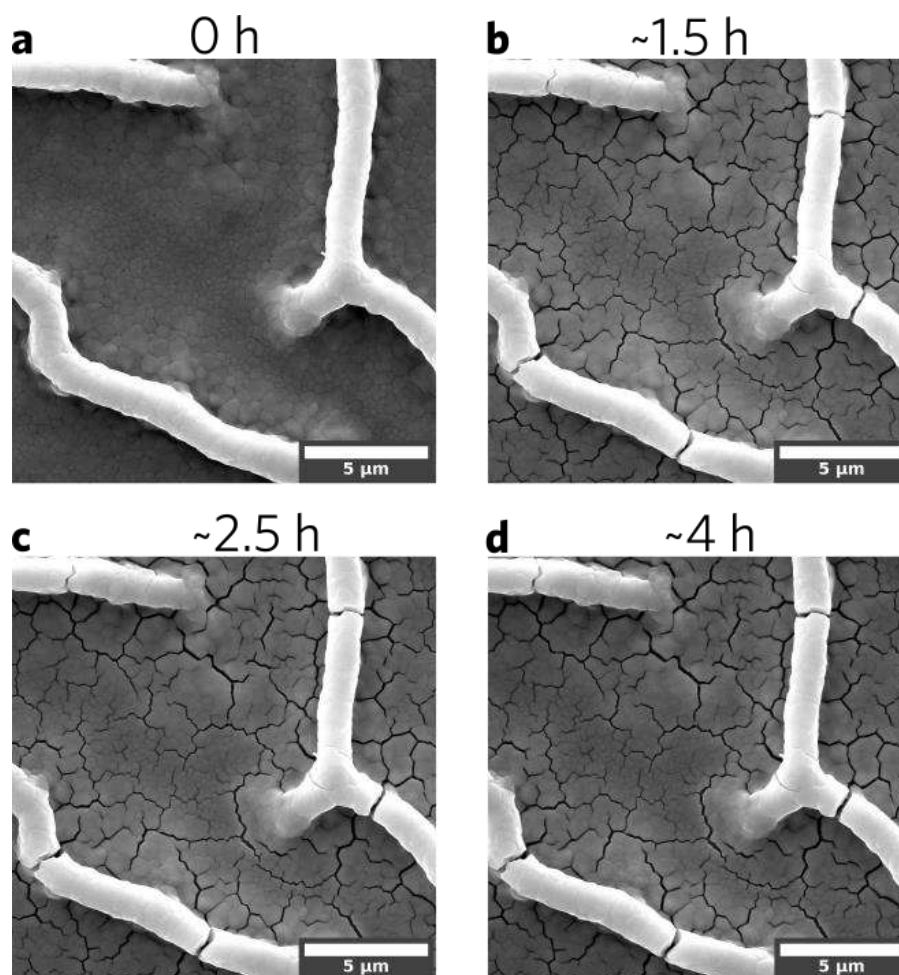

Figure S 10: In-situ FEG-SEM in high-vacuum mode. (a) fresh sample, (b) ~1.5 h, (c) ~2.5 h, (d) ~4 h. See the Supporting Videos for a real-time visualization.

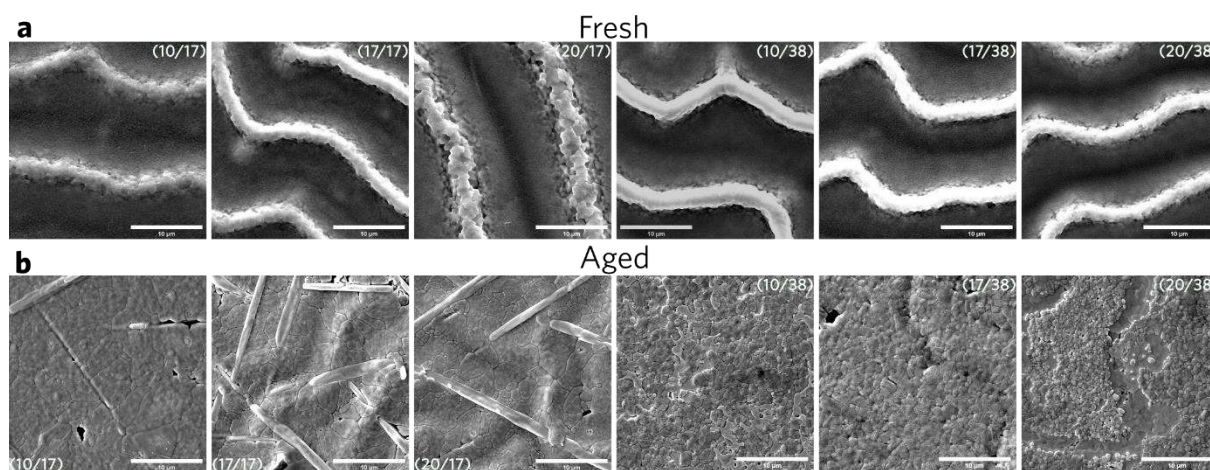

Figure S 11: SEM images of samples 10/17, 17/17, 20/17, 10/38, 17/38 and 20/38 before (a) and after degradation (b).

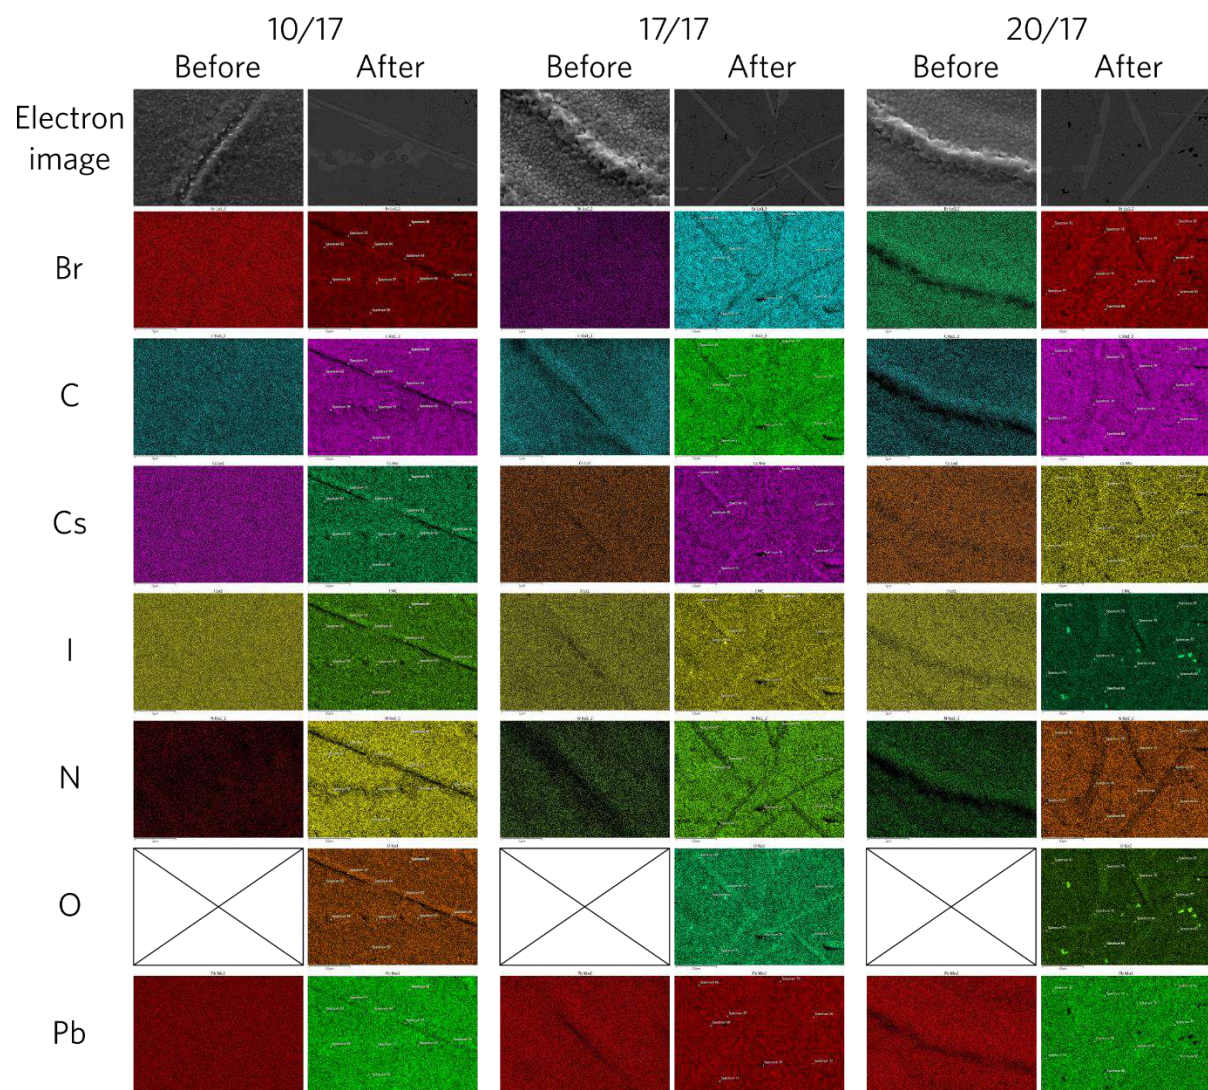

Figure S 12: EDS maps of Br, C, Cs, I, N, O and Pb for samples 10/17, 17/17 and 20/17, before and after degradation.



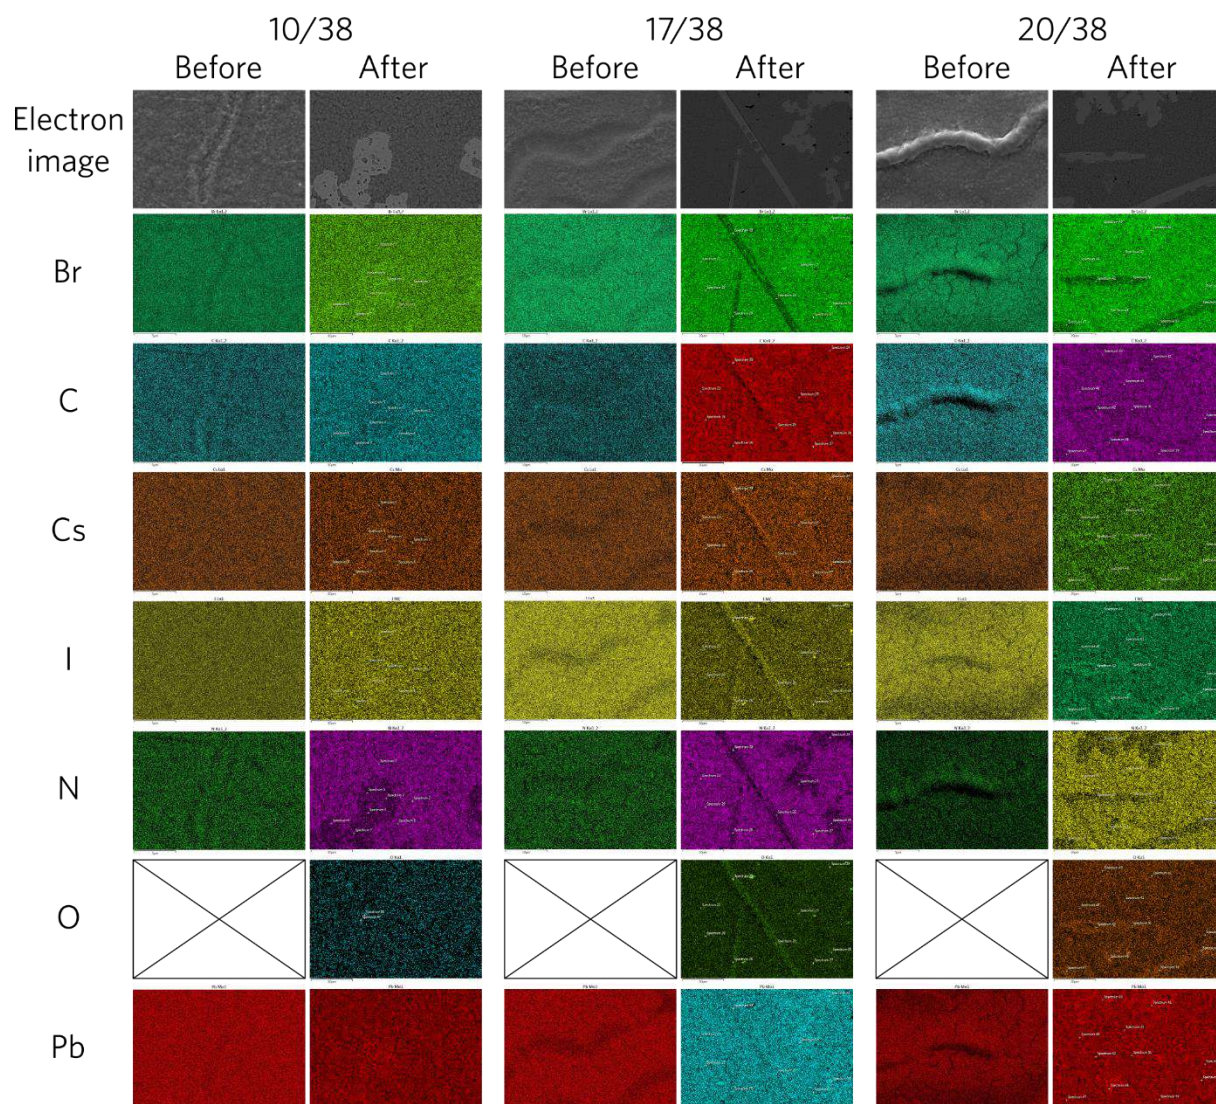

Figure S 13: EDS maps of Br, C, Cs, I, N, O and Pb for samples 10/38, 17/38 and 20/38, before and after degradation.

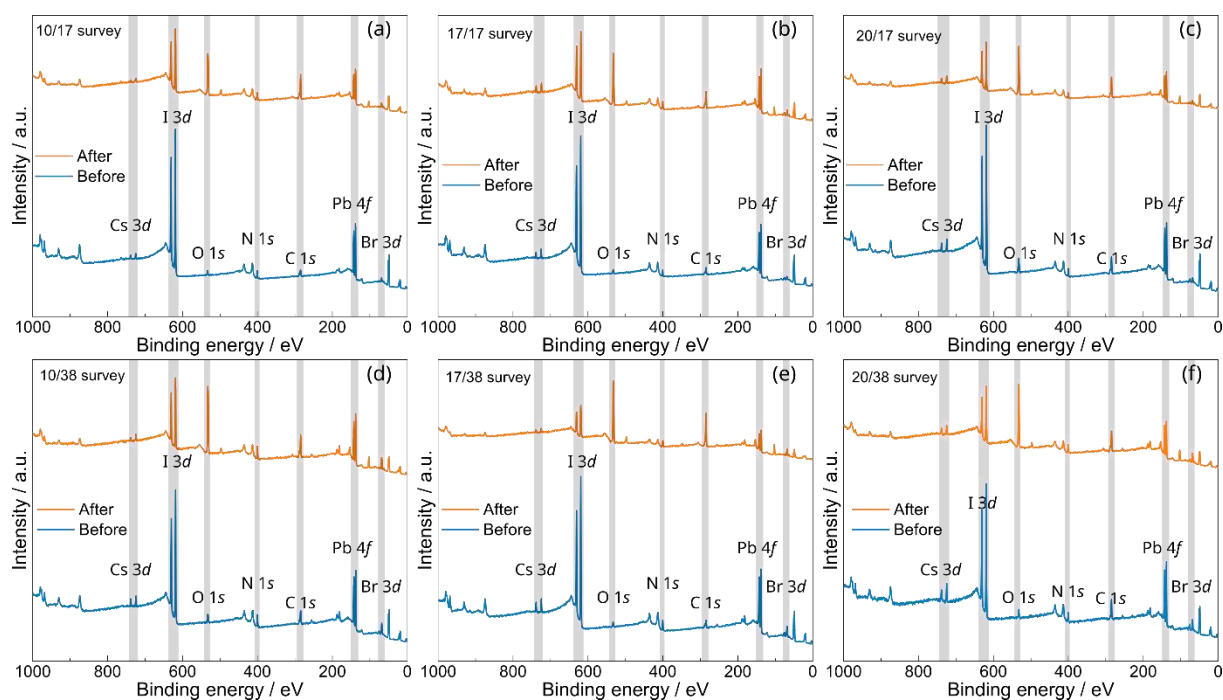

Figure S 14: Before and after degradation XPS survey scan of samples 10/17 (a), 17/17 (b), 20/17 (c), 10/38 (d), 17/38 (e) and 20/38 (f).

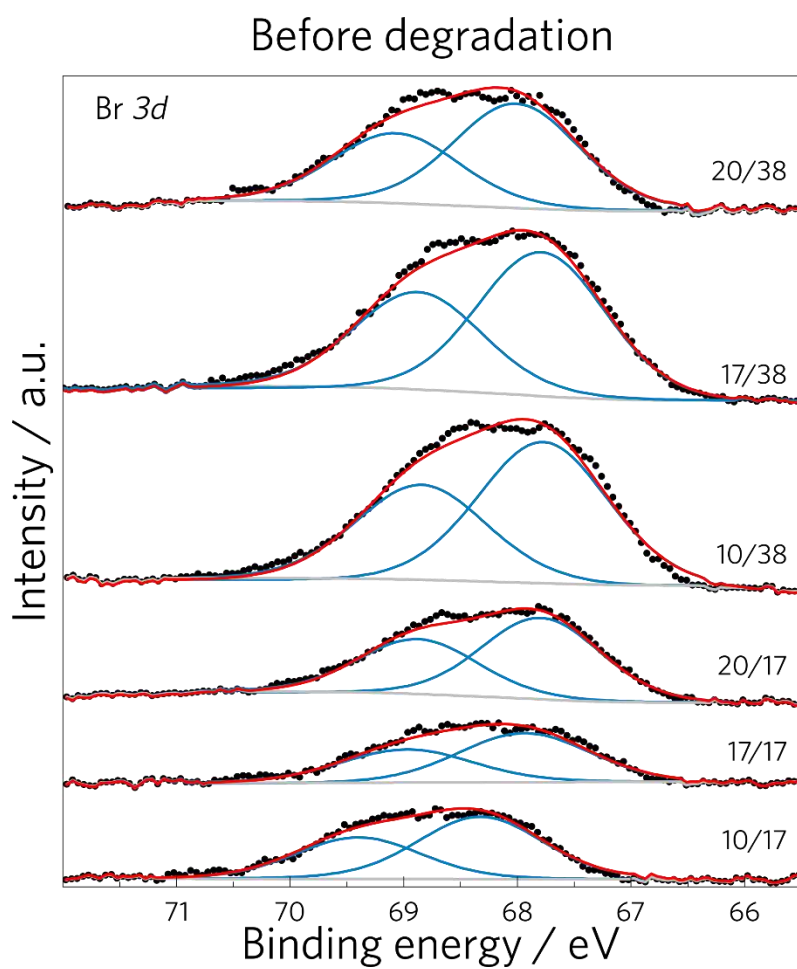

Figure S 15: High resolution XPS Br 3d core level spectra of pristine samples

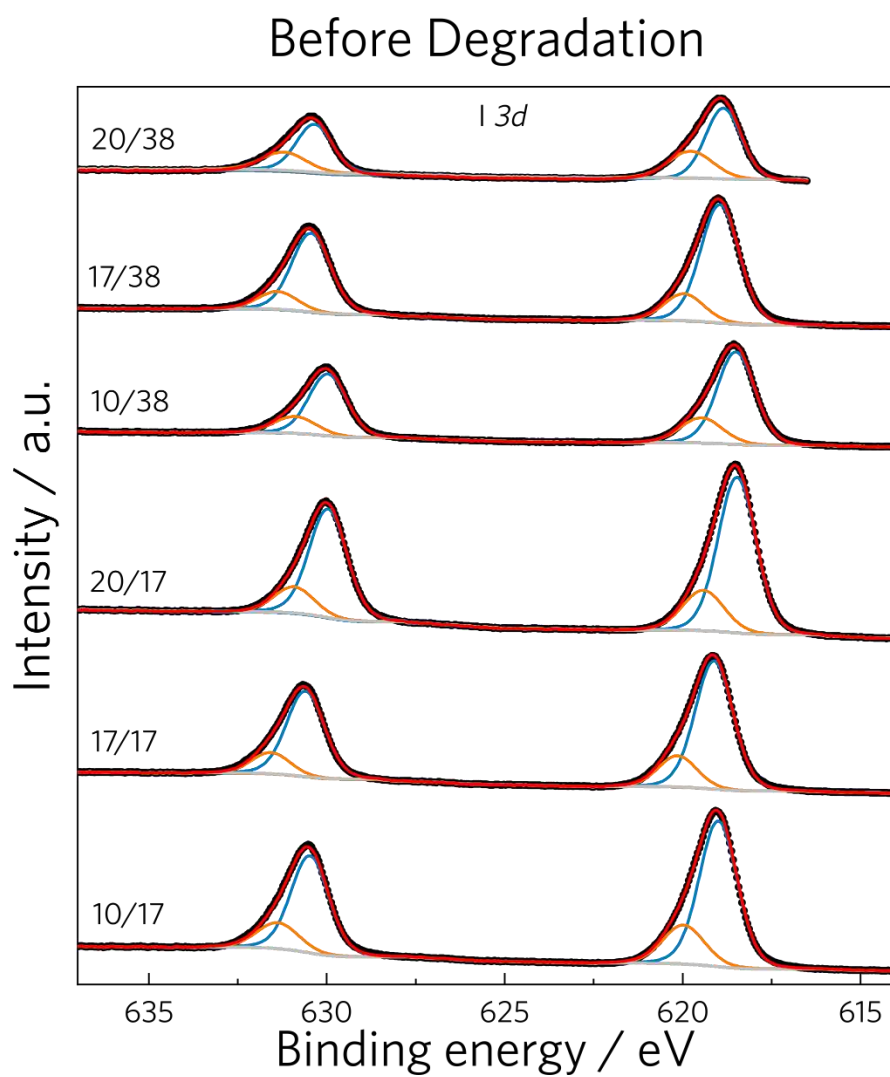

Figure S 16: High resolution XPS I 3d core level spectra of pristine samples.

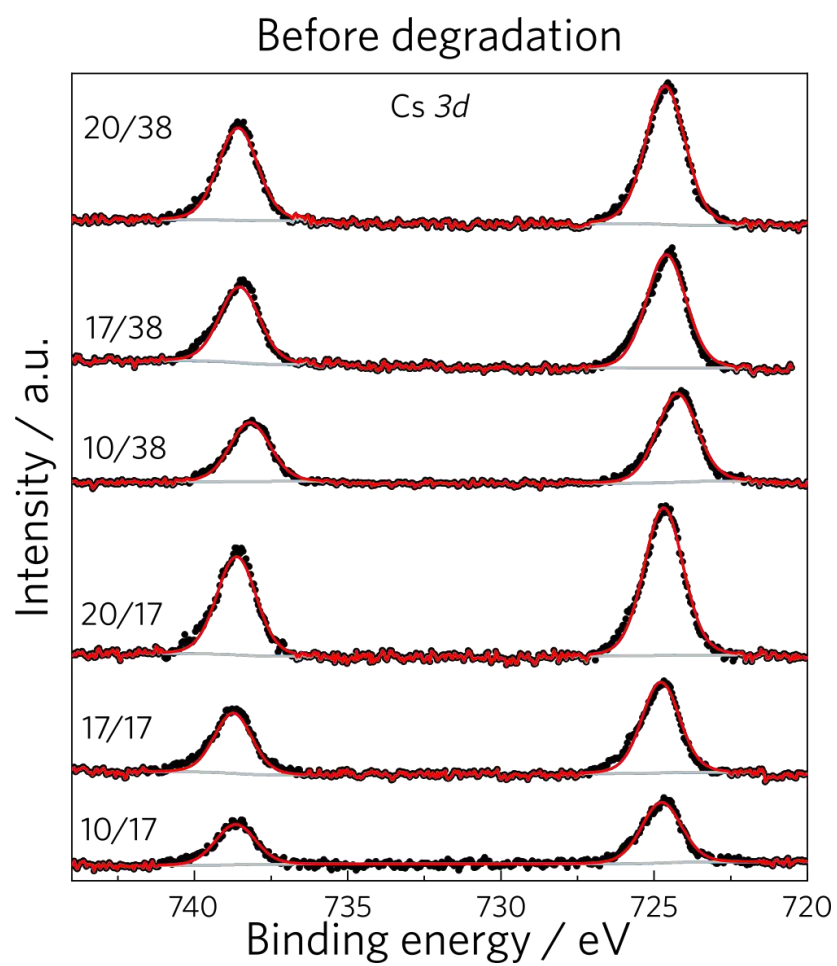

Figure S 17: High resolution XPS Cs 3d spectra of samples of pristine samples .

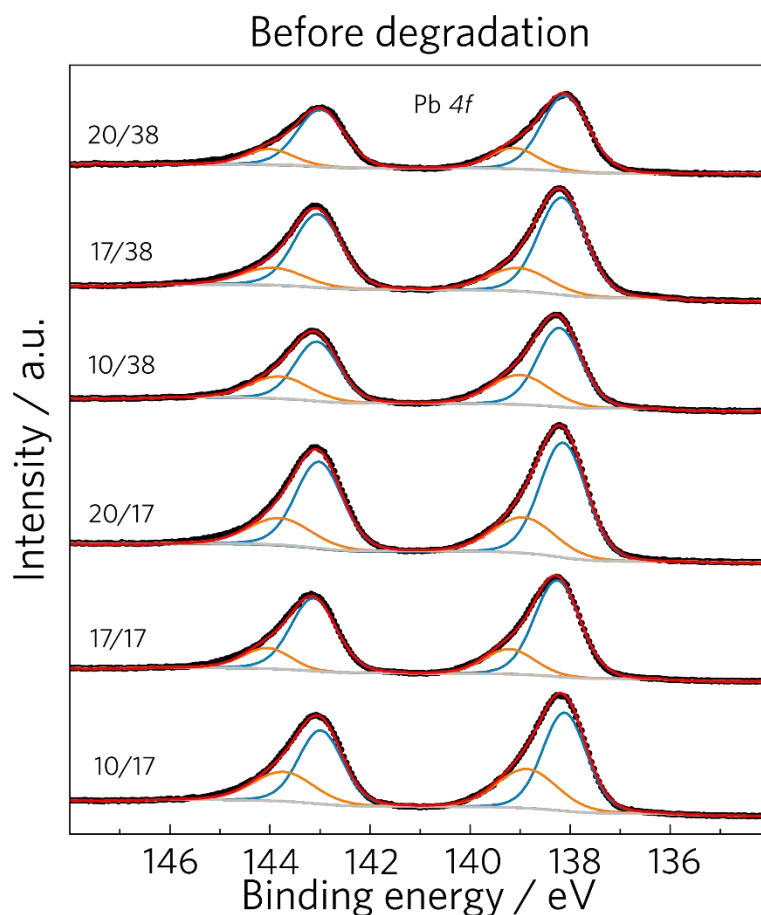

Figure S 18: High resolution XPS Pb 4f core level spectra of samples of pristine samples.

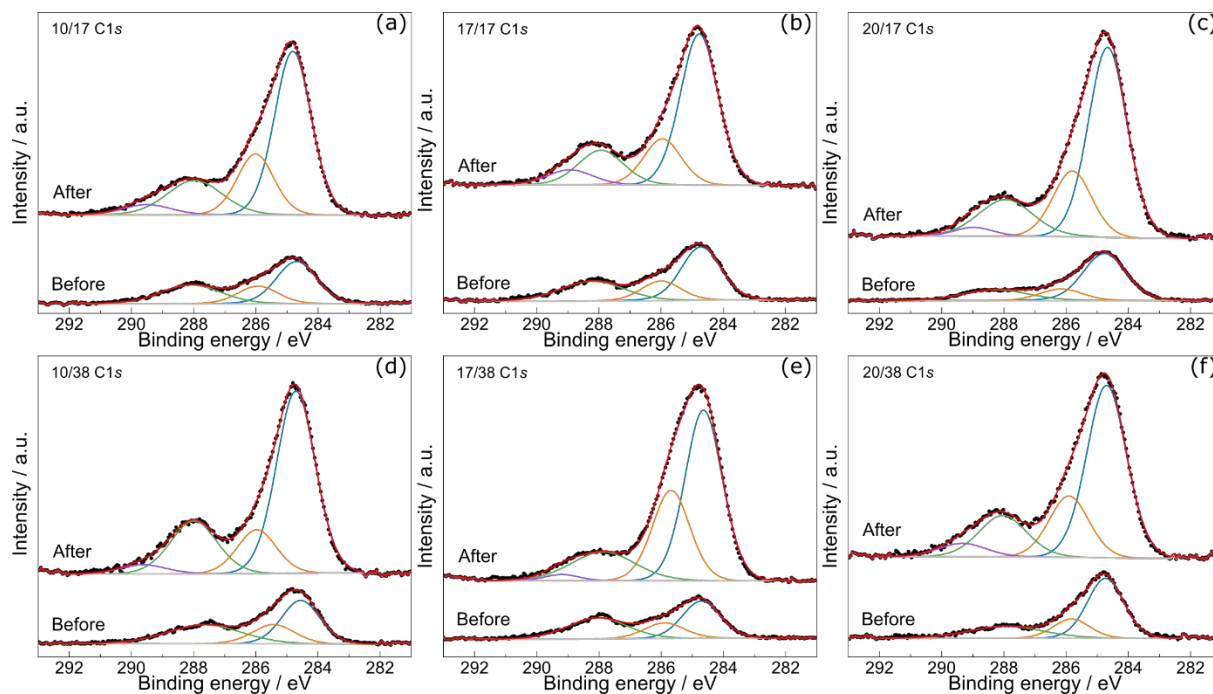

Figure S 19: Before and after degradation high resolution XPS C 1s core level spectra of samples 10/17 (a), 17/17 (b), 20/17 (c), 10/38 (d), 17/38 (e) and 20/38 (f). Deconvolution peaks are attributed to C-H originated from ex-situ absorbed hydrocarbon (blue), C-N bond (orange), conjugated N-C=N (green) and C=O/C-O bond (purple).



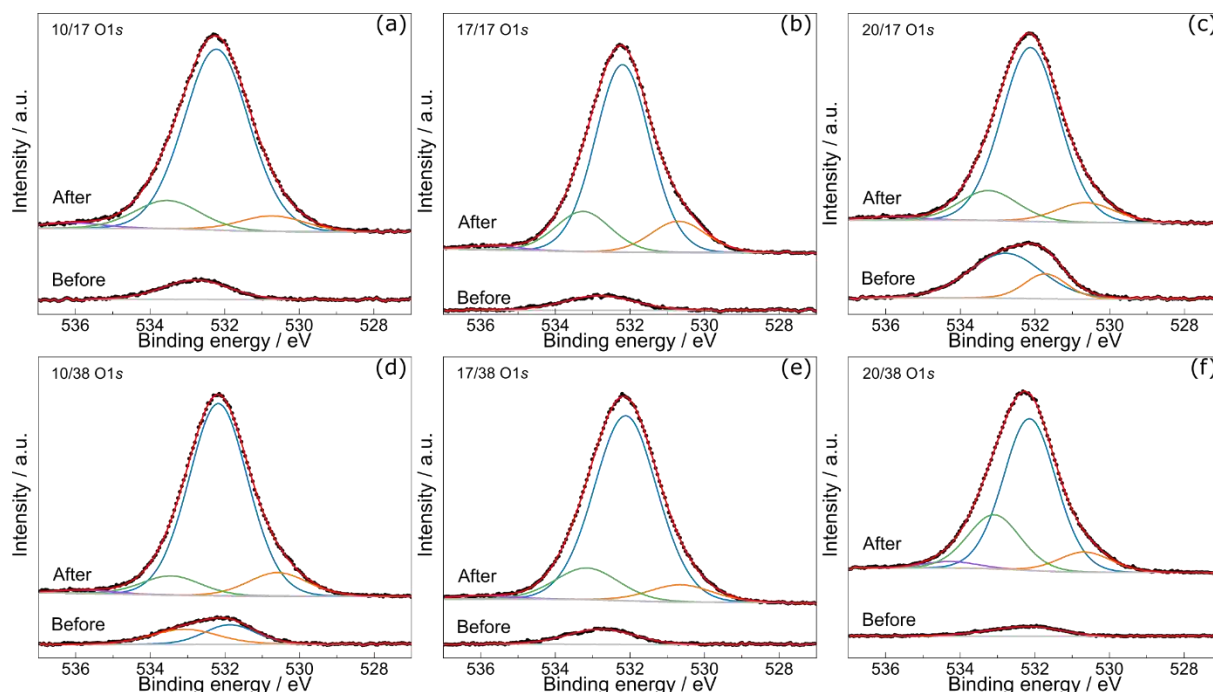

Figure S 20: Before and after degradation high resolution XPS O 1s core level spectra of samples 10/17 (a), 17/17 (b), 20/17 (c), 10/38 (d), 17/38 (e) and 20/38 (f). Deconvolution peaks are attributed to C=O/C-O, carbonate (blue), PbO (orange) O-H bond in Pb(OH)<sub>2</sub> (green) and adsorbed H<sub>2</sub>O (purple).

Table S 2: Ratio between the deconvolution areas for Br 3d and I 3d high resolution XPS spectra of the degraded samples.

| Br 3d Area ratio    |       |       |
|---------------------|-------|-------|
| Br(blue)/Br(orange) |       |       |
| 10/17               | 17/17 | 20/17 |
| 0.8                 | 2.5   | 1.1   |
| 10/38               | 17/38 | 20/38 |
| 3.4                 | 1.5   | 0.8   |
| I 3d Area ratio     |       |       |
| I(blue)/I(orange)   |       |       |
| 10/17               | 17/17 | 20/17 |
| 0.3 <sup>a</sup>    | 0.7   | 1.0   |
| 10/38               | 17/38 | 20/38 |
| 0.6                 | 0.5   | 0.4   |

<sup>a</sup> I (orange) area is the sum of orange and green curves in Figure 7(b).

Table S 3: Before and after degradation (Br3d+I3d)/Pb4f and (Br3d+I3d)/Cs3d XPS peak area ratio of the degraded samples.

| (Br3d+I3d)/Pb4f |       |
|-----------------|-------|
| Before          | After |

|                 |       |       |       |       |       |
|-----------------|-------|-------|-------|-------|-------|
| 10/17           | 17/17 | 20/17 | 10/17 | 17/17 | 20/17 |
| 3.2             | 3.1   | 3.0   | 1.9   | 1.7   | 1.7   |
| 10/38           | 17/38 | 20/38 | 10/38 | 17/38 | 20/38 |
| 3.6             | 3.5   | 3.2   | 1.5   | 1.5   | 1.6   |
| (Br3d+I3d)/Cs3d |       |       |       |       |       |
| Before          |       |       | After |       |       |
| 10/17           | 17/17 | 20/17 | 10/17 | 17/17 | 20/17 |
| 33.7            | 19.2  | 15.4  | 17.8  | 7.2   | 6.4   |
| 10/38           | 17/38 | 20/38 | 10/38 | 17/38 | 20/38 |
| 33.3            | 20.0  | 12.7  | 13.6  | 8.5   | 6.4   |

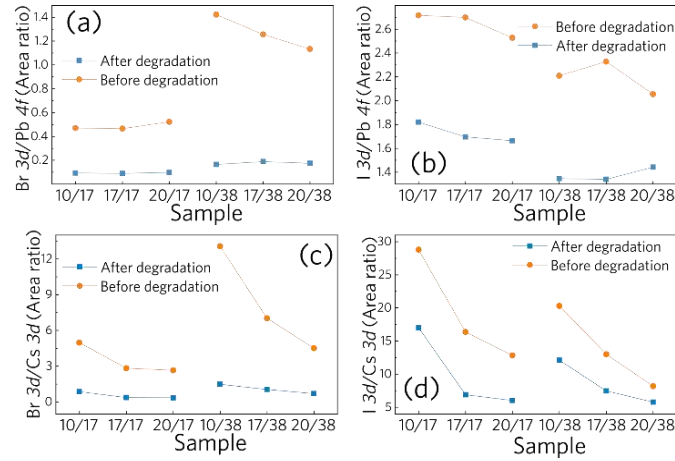

Figure S 21: Ratio of the peak areas from high resolution XPS spectra. (a) Br3d/Pb4f, (b) I3d/Pb4f, (c) Br3d/Cs3d and (d) I3d/Cs3d.

## References

- [1] P. Gratia *et al.*, “The Many Faces of Mixed Ion Perovskites: Unraveling and Understanding the Crystallization Process,” *ACS Energy Lett.*, vol. 2, no. 12, pp. 2686–2693, 2017.
- [2] W. Rehman *et al.*, “Photovoltaic mixed-cation lead mixed-halide perovskites: links between crystallinity, photo-stability and electronic properties,” *Energy Environ. Sci.*,

vol. 10, no. 1, pp. 361–369, Jan. 2017.

- [3] K. Persson, “Materials Data on PbBr<sub>2</sub> (SG:136) by Materials Project.” 2016.
- [4] F. Chen *et al.*, “Self-Assembled Growth of Ultrastable CH<sub>3</sub>NH<sub>3</sub>PbBr<sub>3</sub> Perovskite Milliwires for Photodetectors,” *ACS Appl. Mater. Interfaces*, vol. 10, no. 30, pp. 25763–25769, Aug. 2018.
- [5] J.-W. Lee, D.-H. Kim, H.-S. Kim, S.-W. Seo, S. M. Cho, and N.-G. Park, “Formamidinium and Cesium Hybridization for Photo- and Moisture-Stable Perovskite Solar Cell,” *Adv. Energy Mater.*, vol. 5, no. 20, p. 1501310, Oct. 2015.
